# Supplementary material
Source: PubMed Central journal article supplement (PMC2896783)
Supplement: mmc1.pdf [file mmc1.pdf]

## Supplemental Data

### Mutations in Centrosomal Protein CEP152 in Primary Microcephaly Families Linked to MCPH4

Duane L. Guernsey, Haiyan Jiang, Julie Hussin, Marc Arnold, Khalil Bouyakdan, Scott Perry, Tina Babineau-Sturk, Jill Beis, Nadine Dumas, Susan C. Evans, Meghan Ferguson, Makoto Matsuoka, Christine Macgillivray, Mathew Nightingale, Lysanne Patry, Andrea L. Rideout, Aidan Thomas, Andrew Orr, Ingrid Hoffmann, Jacques L. Michaud, Philip Awadalla, David C. Meek, Mark Ludman, and Mark E. Samuels

Figure S1. Multiple Sequence Alignment (MSA1) of *CEP152* Orthologs

Residues are shaded according to sequence conservation (only the region with the mutation is shown).

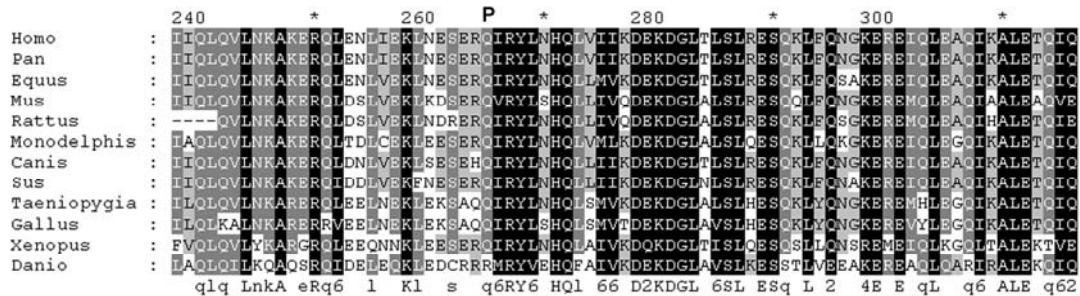

**Table S1. Effects of the Mutations Predicted by SIFT, PolyPhen, and Align-GVGD**

‘+’ and ‘-’ indicate the mutation is predicted to have deleterious or benign effect on protein function, respectively.

| Mutation | Method |          |         |                    |
|----------|--------|----------|---------|--------------------|
|          | SIFT   | PolyPhen | PANTHER | Align-GVGD*        |
| Q265P    | +      | +        | NA      | MSA1, -<br>MSA2, + |

\*With the input alignment of MSA1, mutation p.Q265P is classified to C15 class, a mutation class which is less likely to affect protein function. With the input alignment of MSA2 (no *Danio rerio*), mutation Q265P is classified to C65 class, a class which is most likely to interfere with protein function.

**Figure S2. Conserved Domain Search Results for CEP152**

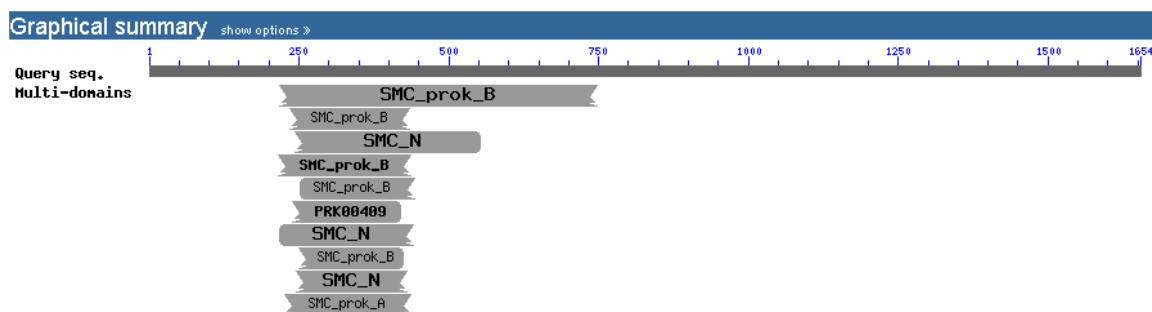

**Table S2. Detailed Conserved domain Search Results for CEP152**

| Description                                                                           | PssmId                 | E-value |
|---------------------------------------------------------------------------------------|------------------------|---------|
| TIGR02168, SMC_prok_B, chromosome segregation protein SMC, common bacterial type      | <a href="#">131223</a> | 3e-08   |
| TIGR02168, SMC_prok_B, chromosome segregation protein SMC, common bacterial type      | <a href="#">131223</a> | 7e-07   |
| pfam02463, SMC_N, RecF/RecN/SMC N terminal domain                                     | <a href="#">111369</a> | 1e-06   |
| TIGR02168, SMC_prok_B, chromosome segregation protein SMC, common bacterial type      | <a href="#">131223</a> | 5e-06   |
| TIGR02168, SMC_prok_B, chromosome segregation protein SMC, common bacterial type      | <a href="#">131223</a> | 7e-06   |
| PRK00409, PRK00409, recombination and DNA strand exchange inhibitor protein; Reviewed | <a href="#">134259</a> | 2e-05   |
| pfam02463, SMC_N, RecF/RecN/SMC N terminal domain                                     | <a href="#">111369</a> | 2e-05   |
| TIGR02168, SMC_prok_B, chromosome segregation protein SMC, common bacterial type      | <a href="#">131223</a> | 3e-05   |
| pfam02463, SMC_N, RecF/RecN/SMC N terminal domain                                     | <a href="#">111369</a> | 4e-05   |
| TIGR02169, SMC_prok_A, chromosome segregation protein SMC, primarily archaeal type    | <a href="#">131224</a> | 9e-05   |

**Figure S3. COILS Predictions for Wild Type (Upper Panel) and Mutant (Lower Panel) CEP152**

The y-axis represents the probability that the protein will form a coiled-coil at each position (x axis) based on sequence similarity with known coiled- coils. Comparison of the COILS predictions shows that position 265 is likely to fall within a coiled-coil, but for the mutant sequence, COILS predicts decreased support for a coiled-coil in the 35-residue window beginning at the position of the missense mutation (Table S3).

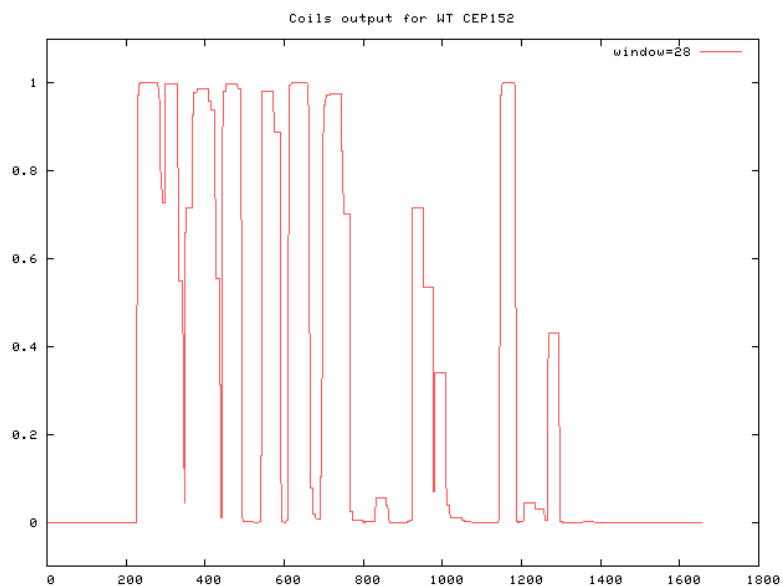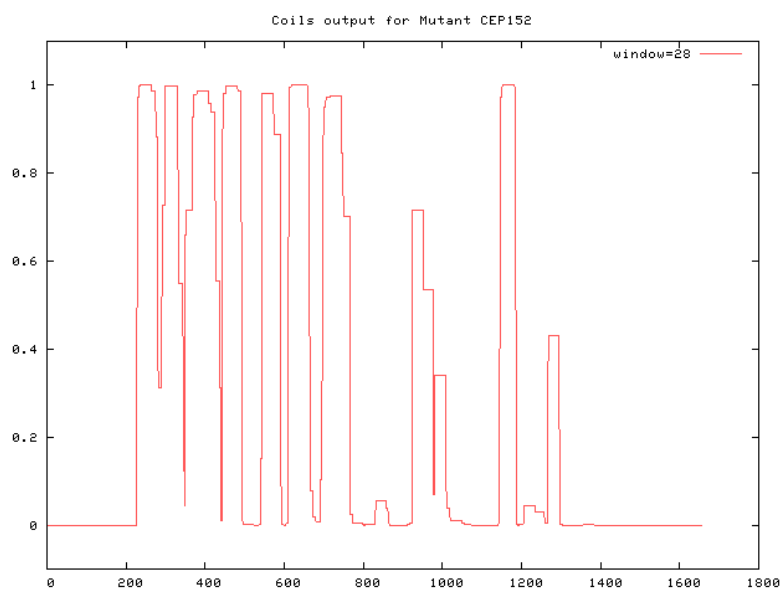

**Table S3. Comparison of COILS Predictions for Wild Type and Mutant CEP152**

Shaded rows indicate residues for which COILS predicts decreased support for a coil-coil in the mutant sequence.

| Position | Wild type |          |       | Mutant   |          |       |
|----------|-----------|----------|-------|----------|----------|-------|
|          | AA        | Register | P     | AA       | Register | P     |
| 263      | E         | e        | 1.000 | E        | e        | 1.000 |
| 264      | R         | f        | 1.000 | R        | f        | 1.000 |
| 265      | <b>Q</b>  | g        | 1.000 | <b>P</b> | g        | 0.987 |
| 266      | I         | a        | 1.000 | I        | a        | 0.987 |
| 267      | R         | b        | 1.000 | R        | b        | 0.987 |
| 268      | Y         | c        | 1.000 | Y        | c        | 0.987 |
| 269      | L         | d        | 1.000 | L        | d        | 0.987 |
| 270      | N         | e        | 1.000 | N        | e        | 0.987 |
| 271      | H         | f        | 1.000 | H        | f        | 0.987 |
| 272      | Q         | g        | 1.000 | Q        | g        | 0.987 |
| 273      | L         | a        | 1.000 | L        | a        | 0.987 |
| 274      | V         | b        | 1.000 | V        | b        | 0.941 |
| 275      | I         | c        | 1.000 | I        | c        | 0.936 |
| 276      | I         | d        | 1.000 | I        | d        | 0.936 |
| 277      | K         | e        | 1.000 | K        | e        | 0.882 |
| 278      | D         | f        | 1.000 | D        | f        | 0.882 |
| 279      | E         | g        | 1.000 | E        | g        | 0.882 |
| 280      | K         | a        | 0.997 | K        | a        | 0.488 |
| 281      | D         | b        | 0.995 | D        | b        | 0.387 |
| 282      | G         | c        | 0.988 | G        | c        | 0.312 |
| 283      | L         | d        | 0.988 | L        | d        | 0.312 |
| 284      | T         | e        | 0.988 | T        | e        | 0.312 |
| 285      | L         | f        | 0.940 | L        | f        | 0.312 |
| 286      | S         | g        | 0.808 | S        | g        | 0.312 |
| 287      | L         | a        | 0.808 | L        | a        | 0.312 |
| 288      | R         | b        | 0.788 | R        | b        | 0.312 |
| 289      | E         | c        | 0.788 | E        | c        | 0.312 |
| 290      | S         | d        | 0.788 | S        | d        | 0.312 |
| 291      | Q         | e        | 0.726 | Q        | e        | 0.726 |
| 292      | K         | f        | 0.726 | K        | f        | 0.726 |

**Figure S4. Paircoil2 Predictions for Wild Type (Upper Panel) and Mutant (Lower Panel) *CEP152***

The y axis represents the p-score, with smaller p-scores signifying support for a coiled-coil conformation at each position (x axis). Paircoil2 predictions are highly consistent between the wild type and mutant sequences. Comparison of the results shows that positions 265-282 are predicted to be included in a coiled-coil in the wild type sequence, but are not included in the predictions for the mutant sequence using a default p-score cut-off of 0.025 (Table S4).

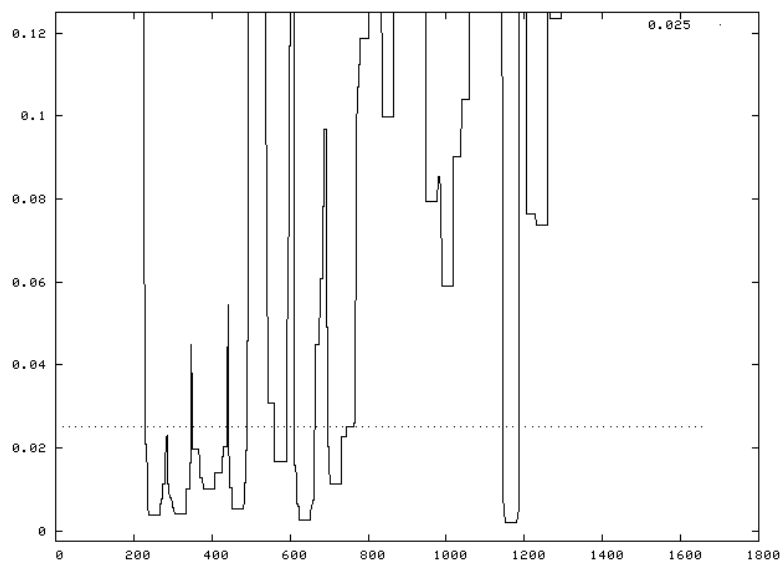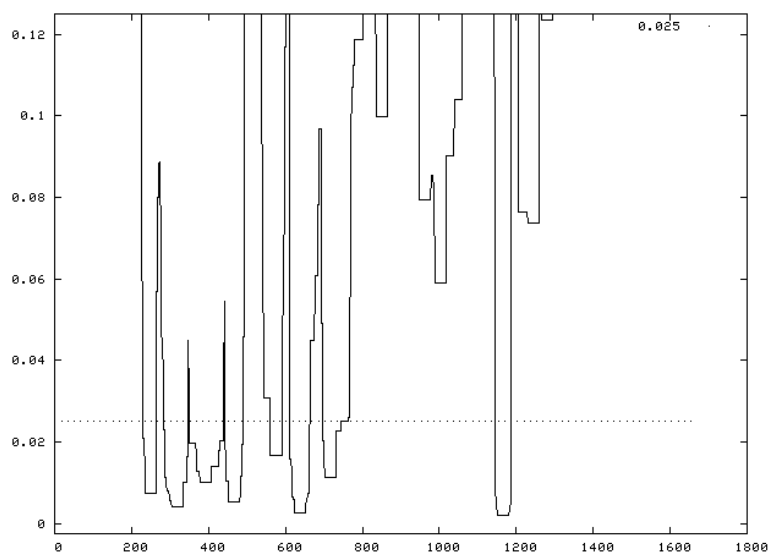

**Table S4. Comparison of Paircoil2 Predictions for Wild Type and Mutant *CEP152***

| Wild type CEP152 |           | Mutant CEP152 |                 |
|------------------|-----------|---------------|-----------------|
| p-value          | Range     | p-value       | Range           |
| 0.0039           | 229-346   | 0.0074        | 229- <b>264</b> |
| -                | -         | 0.0042        | <b>283</b> -346 |
| 0.0196           | 350-367   | 0.0196        | 350-367         |
| 0.0102           | 368-429   | 0.0102        | 368-429         |
| 0.0204           | 430-439   | 0.0204        | 430-439         |
| 0.0052           | 443-490   | 0.0052        | 443-490         |
| 0.0168           | 560-590   | 0.0168        | 560-590         |
| 0.0027           | 610-663   | 0.0027        | 610-663         |
| 0.0113           | 698-763   | 0.0113        | 698-763         |
| 0.0019           | 1146-1185 | 0.0019        | 1146-1185       |

**Table S5. MARCOIL Predictions for Wild Type and Mutant *CEP152*, Using 9FAM Emission Matrix (Upper Panel), MTIDK Emission Matrix (Middle Panel), MTK Emission Matrix (Lower Panel)**

| Wild type and mutant <i>CEP152</i>                                                                                                                                                                                                                                                                                                                                                                                                                                                                                                                                                                                                                                                                                                                                                                                                                                                                                                                                                                                                                                                                             |
|----------------------------------------------------------------------------------------------------------------------------------------------------------------------------------------------------------------------------------------------------------------------------------------------------------------------------------------------------------------------------------------------------------------------------------------------------------------------------------------------------------------------------------------------------------------------------------------------------------------------------------------------------------------------------------------------------------------------------------------------------------------------------------------------------------------------------------------------------------------------------------------------------------------------------------------------------------------------------------------------------------------------------------------------------------------------------------------------------------------|
| <p>PREDICTED DOMAINS AT THRESHOLD 90% :</p> <ol style="list-style-type: none"> <li>1. from 238 to 343 (length = 106) with max = 100.0%</li> <li>2. from 371 to 423 (length = 53) with max = 100.0%</li> <li>3. from 446 to 482 (length = 37) with max = 100.0%</li> <li>4. from 547 to 582 (length = 36) with max = 99.3%</li> <li>5. from 624 to 762 (length = 139) with max = 100.0%</li> <li>6. from 839 to 856 (length = 18) with max = 91.4%</li> <li>7. from 927 to 939 (length = 13) with max = 95.6%</li> <li>8. from 1152 to 1179 (length = 28) with max = 100.0%</li> </ol> <p>PREDICTED DOMAINS AT THRESHOLD 99% :</p> <ol style="list-style-type: none"> <li>1. from 246 to 340 (length = 95) with max = 100.0%</li> <li>2. from 376 to 413 (length = 38) with max = 100.0%</li> <li>3. from 452 to 479 (length = 28) with max = 100.0%</li> <li>4. from 566 to 573 (length = 8) with max = 99.3%</li> <li>5. from 627 to 662 (length = 36) with max = 100.0%</li> <li>6. from 701 to 759 (length = 59) with max = 100.0%</li> <li>7. from 1155 to 1177 (length = 23) with max = 100.0%</li> </ol> |

| Wild type and mutant <i>CEP152</i>                                                                                                                                                                                                                                                                                                                                                                                                                                                                                                                                                                                                                                                                                                                                                                                                                                                                                                                                                                                                                                                                             |
|----------------------------------------------------------------------------------------------------------------------------------------------------------------------------------------------------------------------------------------------------------------------------------------------------------------------------------------------------------------------------------------------------------------------------------------------------------------------------------------------------------------------------------------------------------------------------------------------------------------------------------------------------------------------------------------------------------------------------------------------------------------------------------------------------------------------------------------------------------------------------------------------------------------------------------------------------------------------------------------------------------------------------------------------------------------------------------------------------------------|
| <p>PREDICTED DOMAINS AT THRESHOLD 90% :</p> <ol style="list-style-type: none"> <li>1. from 239 to 343 (length = 105) with max = 100.0%</li> <li>2. from 371 to 423 (length = 53) with max = 100.0%</li> <li>3. from 446 to 481 (length = 36) with max = 100.0%</li> <li>4. from 564 to 579 (length = 16) with max = 93.2%</li> <li>5. from 624 to 660 (length = 37) with max = 100.0%</li> <li>6. from 703 to 762 (length = 60) with max = 100.0%</li> <li>7. from 927 to 939 (length = 13) with max = 94.2%</li> <li>8. from 972 to 974 (length = 3) with max = 90.5%</li> <li>9. from 1151 to 1179 (length = 29) with max = 100.0%</li> </ol> <p>PREDICTED DOMAINS AT THRESHOLD 99% :</p> <ol style="list-style-type: none"> <li>1. from 247 to 340 (length = 94) with max = 100.0%</li> <li>2. from 377 to 413 (length = 37) with max = 100.0%</li> <li>3. from 453 to 479 (length = 27) with max = 100.0%</li> <li>4. from 627 to 654 (length = 28) with max = 100.0%</li> <li>5. from 713 to 758 (length = 46) with max = 100.0%</li> <li>6. from 1155 to 1177 (length = 23) with max = 100.0%</li> </ol> |

| Wild type                                                                                                                                                                                                                                                                                                                                                                                                                                                                                                                                                                                                                    | Mutant                                                                                                                                                                                                                                                                                                                                                                                                                                                                                                                                                                                                               |
|------------------------------------------------------------------------------------------------------------------------------------------------------------------------------------------------------------------------------------------------------------------------------------------------------------------------------------------------------------------------------------------------------------------------------------------------------------------------------------------------------------------------------------------------------------------------------------------------------------------------------|----------------------------------------------------------------------------------------------------------------------------------------------------------------------------------------------------------------------------------------------------------------------------------------------------------------------------------------------------------------------------------------------------------------------------------------------------------------------------------------------------------------------------------------------------------------------------------------------------------------------|
| <p>PREDICTED DOMAINS AT THRESHOLD 90% :</p> <ol style="list-style-type: none"> <li>1. from 246 to 343 (length = 98) with max = 100.0%</li> <li>2. from 370 to 423 (length = 54) with max = 100.0%</li> <li>3. from 447 to 482 (length = 36) with max = 100.0%</li> <li>4. from 624 to 656 (length = 33) with max = 99.9%</li> <li>5. from 709 to 762 (length = 54) with max = 100.0%</li> <li>6. from 1152 to 1179 (length = 28) with max = 100.0%</li> </ol> <p>PREDICTED DOMAINS AT THRESHOLD 99% :</p> <ol style="list-style-type: none"> <li>1. from <b>250</b> to <b>340</b> (length = 91) with max = 100.0%</li> </ol> | <p>PREDICTED DOMAINS AT THRESHOLD 90% :</p> <ol style="list-style-type: none"> <li>1. from 246 to 343 (length = 98) with max = 100.0%</li> <li>2. from 370 to 423 (length = 54) with max = 100.0%</li> <li>3. from 447 to 482 (length = 36) with max = 100.0%</li> <li>4. from 624 to 656 (length = 33) with max = 99.9%</li> <li>5. from 709 to 762 (length = 54) with max = 100.0%</li> <li>6. from 1152 to 1179 (length = 28) with max = 100.0%</li> </ol> <p>PREDICTED DOMAINS AT THRESHOLD 99% :</p> <ol style="list-style-type: none"> <li>1. from 250 to <b>263</b> (length = 14) with max = 99.8%</li> </ol> |



-

2. from 376 to 413 (length = 38) with max = 100.0%
3. from 454 to 479 (length = 26) with max = 100.0%
4. from 627 to 649 (length = 23) with max = 99.9%
5. from 717 to 757 (length = 41) with max = 100.0%
6. from 1161 to 1177 (length = 17) with max = 100.0%

2. from **271** to 340 (length = 70) with max = 100.0%
3. from 376 to 413 (length = 38) with max = 100.0%
4. from 454 to 479 (length = 26) with max = 100.0%
5. from 627 to 649 (length = 23) with max = 99.9%
6. from 717 to 757 (length = 41) with max = 100.0%
7. from 1161 to 1177 (length = 17) with max = 100.0%

**Figure S5. SOSUcoil Predictions for Wild Type (Upper Panel) and Mutant (Lower Panel) *CEP152***

**Wild type**

Predicted coil-coil regions:

7-44, 226-499, 520-1039, 1141-1186, 1218-1260, 1283-1310, 1343-1372

Predicted coiled-coil fragile points:

```

226-499          LGANENSAENMQIIQLQVLNKAKERQLENLIEKLNESERQIRYLNHQQLVVIKDEKDGLTSL
register         efgabcdefgabcdefabcdefgabcdefgabcdefgabcabcdefgabcdefgabcdefga
point types     -----D-----B-----
H-philic core(I) ---II-----IIIIII-----
H-phobic outF(O) -----00000000-----
    
```

**Legend**

Fragile point by Heptad breaks:           A:Stutter B:Stammer C:Skip(+) D:Skip(-)  
 Fragile point by Hydrophilic core:       I  
 Fragile point by Hydrophobic outfield:   O

**Mutant**

Predicted coil-coil regions:

7-44, 226-499, 520-1039, 1141-1186, 1218-1260, 1283-1310, 1343-1372

Predicted coiled-coil fragile points:

```

226-499          LGANENSAENMQIIQLQVLNKAKERQLENLIEKLNESERPITYLNHQQLVVIKDEKDGLTSL
register         efgabcdefgabcdefabcdefgabcdefgabcdefgabcabcdefgabcdefgabcdefga
point types     -----D-----B-----
H-philic core(I) ---II-----IIIIII-----
H-phobic outF(O) -----00000000-----
    
```

**Figure S6. Conservation of *CEP152* across Coding Region of Gene**

The plot was obtained for protein sequences using 100-amino-acid-long overlapping windows, sliding using a step of 10 amino acids. For DNA sequences, the window was 300 pb and the step was 30 pb. Nucleotide (in red) and protein (in black); vertebrates (solid lines) and primates (dashed lines).

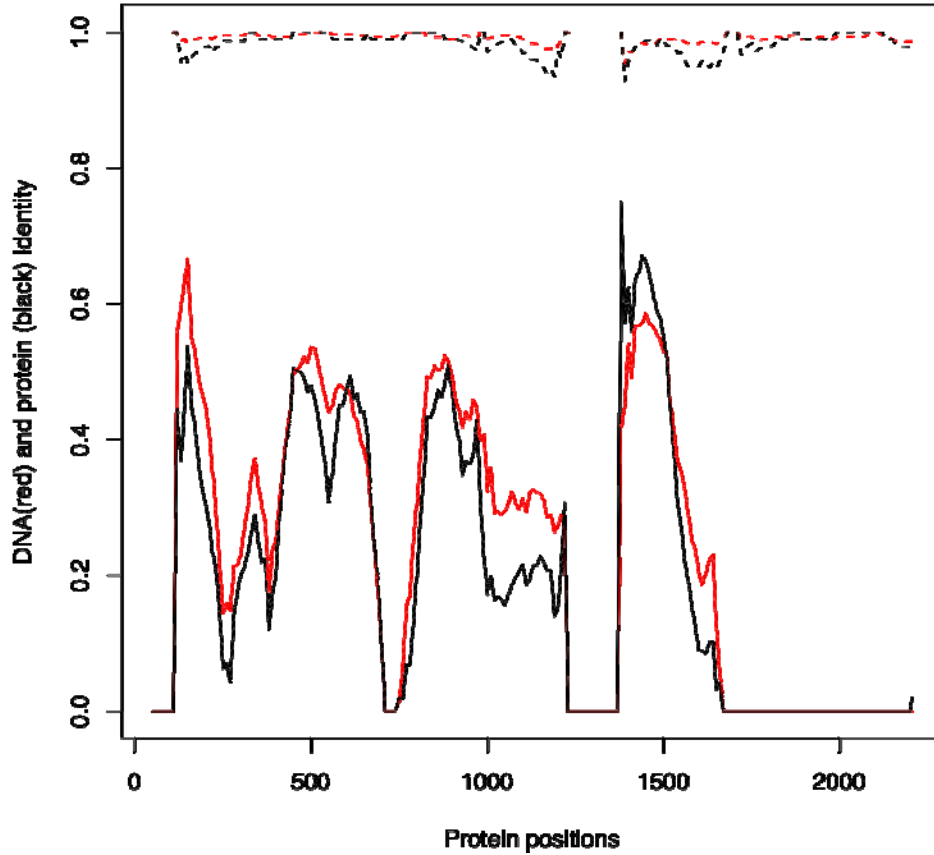

## Figure S7. Sequences of CEP152 Orthologs Used for Evolutionary Selection Analysis

>HUMAN

MSLDFGSVALPVQNEDEEYDEEDYEREKELQQLLTDLPHDMLDDDLSSPELQYSDCSEDGTDGQPHHPEQL  
EMSWNEQMLPKSQSVNGYNEIQSLYAGEKCGNVWEENRDKTEDRHPVYHPPEEGGDEGGS-----  
-----GYSPPSKCEQTDLYHLPENFRPYTNGQKQEFNNQATNVIKFSDPQWNHF-Q-----  
GPSCQGLEPYNKVYKPYQSSAQNN-GSPAQEIIT-GSDTFEGLQQQFLG-  
ANENSAENMQIIQLQVLNKAKEKQLENLIEKLNESERQIRYLNHQLVVIKDEKDGLTSLRESQKLFQNGK  
EREIQLEAQIKALETQIQALKVNEEQMIKKSRTEMALESKQQLVLDLHHSESLQRAREQHESIVMGLTKK  
YEEQVLSLQKNLDATVTALKEQEDICSRDKDHVKQLERNQEAIKLEKTEIINKLTRSLEESQKQCAHLLQS  
GSVQEVAAQLQFQLQQAQKAHAMNSANMNKALQEELTELKDEISLYESAAKLGIIHPSDSEGELNIELTESYVD  
LGIKKVNWKKSKVTSIVQEEDPNEELSKDEFILKKAQVQRLLGNSMNRHLVSQLQNDLKDCHKKIEDLH  
QVKKDEKSEIEVETKTDTSSEKPKNLWPESSSTSD-VVRDDILLKNEIQVLQQQN-----  
QELKETEGKLRNTNQDLNQMQRMQVQDFDHDKQEAVDRCERTYQQHHEAMKTQIRESLLAKHAKLEKQQLFE  
AYERTHLQLRSELDKLNKEVTAVQECYLEVCREKDNLELTLRKTTEKEQQTQE-----

KIKEKLIQQLEKEQWQSKLDQTIKAMKKKTLDCGSQTDQVTTSDVISKKE-  
MAIMIEEQKCTIQQNLEQEKDIAIKGAMKKLEIELELKHCCENITKQVEIAVQNAHQRWLGELPELAEYQAL  
VKAQKQKWEQHEVSVNKRISFAVSEAKEKWKSELENMRKNILPGKELEEKIHSLOKLELKNEEVPPVIR  
AELAKARSEWNKEKQEEIHRIQEQNEQDYRQFLDDHRNKINEVLAAAKEDFMKQKT-----

ELLLQKETELQTCLDQSRREWMTQEAKRQLEIYQYEEDILTVLGVLLSDTQKEHISDSEDKQLEIMSTC  
SSKWMVSVQYFEKLGCIQKAFQDTLPLLVENADPEWKKRNMAELSKDSASQGTG-  
QGDPGPAAGHHAQPLALQATEAEA-----

EENNKVVEELIEENNDMKNKLEELQTLCKTTPRSLGAGAIENACLPCSGGAEELRGQYIKAVKKIKCDML  
RYIQESKERAAEMVKAQVLRERQETARKMRKYLLICLQQILQDDGK-E-  
GAEKKIMNAASKLATMAKLETPISSKSQSKTTQS----  
ALPLTSEMLIAVKKSKRNDVNQKIPCCIESKSNVNTITRITLCEQAPKRRACNLQRLLENSEHQSIKHVG  
SKETHLEFQFGDGSCKHLNSLPRNVSPFVPCGEGGFGLHKKKDLLSDNGSESLPHSAAYPFL----  
GTLGNKPSRPTPGPSESGCMHITFRDSNERLGLKVYKCNPLMES-ENAASEKSQGLDVQEPVVKDGG-  
DLSDCLGWPSSEA-TLSFDSREASFVHGRPQGTLEIPSESVKSKQFSPSGYLSDT-  
EESNMICQTMKCQRYQTPYLSEETTYLEPGKISVNCGHPSRHKADRLKSDFKKLSSTLPSSVCQQPSRKLIV-  
PLSSQQDSGFDSFPVNLV

>RHESUS

MSLDFGSVALPAQNEDEEYDKEDYEREKELQQLLTDLPHDMLDDDLSSPEPQYSDCSEDGTDQRPHHPEQL  
EMSWNEQMLPKSQSVNDYNEIQSLYAGEKCGNVWEENRDKTEDRHPVYHPPEEGGDEGGS-----  
-----GYSPPSKCEQTDLYHLPENFRPYTNGQKQEFNNQPTNVIKFSDPQWNHF-Q-----  
GPSCQGLEPYNKVYKPYQSSAQNN-GSPAQAIIIT-GSDTFEGLQQQFLG-  
ANENSAENMQIIQLQVLNKAKEKQLENLVEKLNESERQIRYLNHQLVVIKDEKDGLTSLRESQKLFQNGK  
EREIQLEAQIKALETQIQALKVNEEQMIKKSRTEMALESKQQLVLDLHHSESLQRAREQHESIVMGLTKK  
YEEQVLSLQKNLDATVTALKEQEDICSRDKDHVKQLERNQEAIKLEKTEIINRLTRSLEESQKQCAHLLQS  
GSVQEVAAQLQFQLQQAQKAHTMSANMNKALQEELTELKDEISLYESAAKLGIIHPSDSEGELNIELTESYVD

LGIKKVNWKKSKVNSIVQQEDPNEELSKDEFILKKAQVORLLGSNSMKRRLVSQLQNDLKDCHKKIEDLH  
QVKRDEKSIEVETKTDTSEKPKNQLWLESSTSD-IVRDDILLKNEIQVLQQQN-----  
QELKETEELRNTNQDLNQMQRQMVQDFDHDKREAVDRCERTYQQHHEAMKTQIRESELLAKHALEKQQLFE  
AYERTHLQLRSELDKVNKEMTAVQECYLEVCREKDHLESTLRKTTTEKEQQTQE-----

KIKEKLIQQLEKEWQSKLDQTIKAMKTKTSDRGSQTDQVTTSDVISKKE-  
MAIMIEEQKCI IQQHLEQEKDIAIKGAMKKLEIELELKHCCENIAKQVEI AVQNARQRWL GELPELAEYQAL  
VRAEQKKWEEQHEVSVNKRISFAVSEAKEKWKSELENMKNILPGTELEEKIHSLQRELELKNEEVPVIR  
AELAKARSEWNKEKQEEIRR IQEQNEQDYRQFLDDHRNKINEVLAAAKEDFMKQKT-----

ELLLQKETELQTCLDQSRREWMTQEAQRIQLEIYQYEEEDILTVLGVLLRDTQKEHVSDSEDKQLLEIMSTC  
SSKWMVSVQYFEKLGKCIQKAFQDTPLLVENADPQWEKRNMAELSKDSASRSTG-  
QGVPGPAAGHHAQPLALQETEAEA-----

EENNKVIEELIEENNDMKNKLEELRTLCKTTPRSL SAGAI ENTCLPCSGGALEELRGQYIKAVKKIKRDML  
RYIQESKERAAEMVKAQVLRERQETARKMRKYLLICLQQILQDDGK-E-  
GAEKKIMNAASKLATMAKLETPISSKSESKTTQS-----  
PLTSEMLIGVEKSKRNDVNQKISCCIESKSNVNTITRSVCEQAPKRRACNLQRLLENS DHRSIKHVGSK  
ETHLEFQFGDGSKHLHSLPRNVSPFVPCGEGGFLGHKKKDLLSDNGSESLPHSAAYPFL----  
GTLGNKPSRPTSSPSESGCMHITFRDSNERLGLKVYKCNPLMES-ENAASKKSQGLDVQEPVVKDGG-  
DLSDCLGWPSSA-TLSFESREASFVHGRPQGTLEIPNESVNSKQFSPSGYLSDT-  
ETSNMICQTMKCQHDQTPYLSSEETMYLEPGKISVTHGYPSHHKADRLKPDFKLLSSTLPSSVCQQPSRKL I  
V-PLSSQQDSGFDSPPVNL D

>CHIMP

MSLDFGSVALPVQNEDEEYDKEDYEREKELQQLLTDLPHMLDDDLSSPELQYSDCSEDTGQPHHPEQL  
EMSWNEQMLPKSQSVNGYNEIQSLYAGEKCGNVWEKNRKTEDRHPVYHPE-GGDEGGS-----  
-----GYSPPSKCEQTDLYHLPENFRPYTNGQKQEFMNQATNVIKFSDPQWNHF-Q-----  
GPSCQGLEPYNKVYKPYQSSAQNNDGSPAQEIT-GSDTFEGLQQQFLG-  
ANENSAENMQIIQLQVLNKAQERQLENLIEKLNESERQIRYLNHQLVI IKDEKDGLTSLRESQKLFQNGK  
EREIQLEAQIKALETQIQALKVNNEEQMIKKSRTTEMALESLKQQLVDLHHSESLQRAREQHESIVMGLTKK  
YEEQVLSLQKNLDATVTALKEQEDICSRKLDHVKQLERNQEA IKLEKTEI INRLTRSLEESQKQCAHLLQS  
GSVQEVQQLQFQLQQAQKAHAMNSANMNKALQEELTELKDEISLYESA AKLGIHPSDSEGELNIELTESYVD  
LGIKKVNWKKSKVTSSVQEEEDPNEELSKDEFILKKAQVORLLGSNSMKRRLVSQLQNDLKDCHKKIEDLH  
QVKRDEKSIEVETKTDTSEKPKNQLWPESSTSD-VVRDDILLKNEIQVLQQQN-----  
QELKETEGLRNTNQDLNQMQRQMVQDFDHDKQEA VDRCERTYQQHHEAMKTQIRESELLAKHALEKQQLFE  
AYERTHLQLRSELDKLNKEMTAVQECYLEVCREKDNLELTLRKTTEKEQQTQE-----

KIKEKLIQQLEKEWQSKLDQTIKAMKKKTSDCGSQTDQVTTSDVISKKE-  
MAIMIEEQKCTIQQNLEQEKDIAIKGAMKKLEIELELKHCCENITKQVEI AVQNARQRWL GELPELAEYQAL  
VRAEQKKWKEQHEVSVNKRVSFAVSEAKEKWKSELENMRKNILPGKELEEKIHSLQRELELKNEEVPVIR  
AELAKARSEWNKEKQEEIHR IQEQNEQDYRQFLDDHRNKINEVLAAAKEDFMKQKT-----

ELLLQKETELQTCCLDQSLREWMTQEAKR IQLEIYQYEEEDILTVLGVLLSDIQKEHISDSEDKOLLEIMSTC  
SSKWMSLQYFEKLGKCIQKAFQDTLPLLIENTDPEWKKRNMAELSKDSASRGTG-  
QGDPGPAAGHHAQPLALQATEAEADK-----  
KKVLEIKDLCCGHCFQELEKAKQECQDLKKGKLEKCCRHLQHLERKHKAVVEKIGEENNKVVEELIEENNDM  
KNKLEELRTLCKTPPRSLGAIENACLPCSGGAL EELRGQYIKAVKKIKHDMLRYIQESKERAEMVKA  
VLRRERQETARKMRKYLI CLQQILQDDGK-E-GAEKKIMNAASKLATMAKLETPISSKSQSKTTQS----  
ALPLTSEMLIAVKKSKRNDVNQKIPCCIESKSNVNTITRSLCEQAPKRRACNLQRLLENSEHQSIKHVG  
SKETHLEFQFGDGSCKHLNSLPRNVSPFVPCGEGGGFLHKKKDLLSDNGSESLPHSAAYPFL----  
GTLGNKPSRCTPGPSESGCMHITFRDSNERLGLKVYKCNPLMES-ENAASEKSQGLDVQEPVVKDGG-  
DLSDCLGWPSSA-TLSFDSREASFVHGRPQGTLEIPSESVKSKQFSPSGYLSDT-  
EESNMICQTMKCQRDQTPYLSSEETTYLEPGKISVNCGHP SHHKADRLKSDFKKLSSTLPSSVCQQPSRKL I  
V-PLSSQQDSGFDSPFVNL D

>MARMOSET

MSLDFGSVALPAQNEDEEYDEEDYEREKELQQLLTDLPHDMLDDDLSPELHSDYSEDGTDREPHHPEQL  
EMNWNEQVLPKSQLINDYNEIQONLYAGEKCGNVVEENRNKTEDRHPGYHPEEGGDEGGS-----  
-----GYSPPSKCEQTDLYHLPENFRPYTNGQKQEFNNOPTNI IKFSDPQWNHF-Q-----  
GPSCQGLEPYNKVIYKPYQSSAPNN-GSPAPEIT-GSDTFEGLQQQFLG-  
ANEKSAENMQIIQLQVLNKAKERQLENLVEKLNESERQIRYLNHQLLI IKDEKDGLTSLRESQKLFQD GK  
EREIQLEAQIKALETQIQALKVNEEQMIKKSRTEMALESVKQQLVDLHHSESLQRAREQHESIVMGLTKK  
YEEQVLSLQKNLDATVAALKEQEDICSHLKDHVQQLERNQEAIKLEKTEI INRLTRSLEESQKQCAHLLQS  
GSVQEAQAQLQFQLQQAQKAHAMSENMNKALQEELTELKDEISLYESA AKLGIHPDSEGLVNI ELTESYVN  
LGIKKANWKKSKVKSIVQHEYPNEELSKDEFILKKAQVQRLLGSNSMKRRLVTQLQNDLKDCHKKIEDLQ  
QVKEDEKSI EVETKTD TSEKQTNQLWPESSTPN-TVRDDILLKNEIQVLQQQN-----  
QELKETEEKLRTTNQDL CNQMRQMVQDFDHDKQEA VDRCERTYQQHHEAMKTQ IRESLLAKHALEKQQLFE  
VYERTHLQLRSEL DKNKEMSAVQECYLEVCREKDNLESILRKTA EKEQQAQE-----  
-----

KIKEKLTQQLEKEWQSKLDQTIKAVKKKTSDCGSQTDQVTTSDVISKKE-  
MAIMIEEQKHTIQONLEQEKDIAIKEAVKKLEMELELKYCENITKQVEI AVQONARQRWL GELPELAEYQAL  
VRAEHKKWEEQHEISVNRKILFAVSEAKEKWKSELENRKKNILPGKELEEKFHSLQRELKLN EEPVVR  
AELAKARSEWNKEKQEEIHR IQERNEQDYRQFLDDHRNKINEVLAAAKEDFMKQKT-----  
-----  
-----

----- ELLLQKETELQTCCLDQSRREWMTQEAKR IQLEIRQYEEEDILTVLEFLLR-  
TQKEHVNDSENTOLLEILSTCSSKWM SVQYFEKLGKACIQKAFQDTLLQLTENIDPEWEKRNMS ELAKDSAR  
RGTG-QGDPGPTAGHHAQPLALQQTAEAEV-----  
-----

EENNKVVEELIEENNDMKNKLEELRTLCKTPPRSLGAIENGCLPCSGGAL EELRGQYIKAVKKIKRDML  
RYIQESKERAEMVKA EVLRRERQETARKMRKYLI CLQQILQDDGK-E-  
GAEKKIMNAASKLATMAKLETPISSKSHSKTTQS----  
ALPLTSEMLIAVKKSKRNDVNQKIPCYDESKSNLNTITRSGVCEQVPKRRACNLQRLLENSEHSGSRKHVG  
SKETHLEFQFGDSSCKHLNSLPRKASHEFVPCGEGGGFLHKKKHL L TDNGSESLHSDAYF-L----  
GTLGSKPSLRCTPSPSESGCMNII FHPDNERLGLKVHKCSLPMES-ENVASEKSQGLGVQEPVVRDGG-  
DLSNSLGLWPSSA-ALPVD SHQASVFC SRPQGTLEIPTESVNSKQFSPSSCLSDT-  
ENSNMICQTMCKRDQTPYLSSEETTYLQPGEISVTHGHP SHHKANILKSDFEKLSSTLPSSVCQQPSRKL I  
V-PLSSQQDSGFDSPFVNL D

>OPOSSUM

MSQDFGSV-----  
-----  
-----  
FDNVALQSQNDEEEYQEDYAREKELHQLLTDLPHDMLDDDLSSPDLNLSDCSEDATVGQTHKIQDPEDSW  
NEHHVLP-KPQSGYDDVQNLYPGEKXVNGWEEHHRKNEEDLYTGCNIEEHHDGGS-----  
-----GYSSTNEYEQNDLYQLPENFRPYTNGQKKEFNNOPTKIINF'PDGQREHF-  
QQFGTSHV PNSQALESY-KV TYKPYQTSSQNN-VSSNQERTRRNDEFEEEMQKFL E-  
PAENSLENMQIAQLQVLNKAKEQLTDLCEKLEESERQIRYLNHQLVMLKDEKDGLALSLOESQKLLQK GK  
EKEIQLEGQIKALETQIQTLKANEEQMIKKARVSEVAMENLRQQLELRHSDSLQRAKEQHENIVLCLRKK  
YEDQV'TTLQKNLEVTNAVLQE QKDI CCRLRDHVQKVERSQEENKMEKTEI INRLTKSLEESQKQCANLLET  
GSVQEMNQLKLQQLQQAQSAHTLSDSMNKALQEELAEELKEEITLYESA AKLG VFSNSPDEELNLDLAE SYVD  
LGIKKTNWKKSNI LSTMQKSEPNELPKDEIIMRLKSELQRL L TSNTVKRRLVSQLQNDLKDCHRRLEDLS  
QQKKSQEKCELETKSINVEKSPNRLWHDSSVYDKTVKEDILRLKNEIQSLQOEK-----  
EDLKATEEKLKSTNQDLCSQMRQMVQDFDRDKQETVDRCERTFQQHHEAVKNQIRESLLAKHTLEKQQLFE  
VYESNRLQLRADLDKVNKEMATVQECYLA VCKEKDNLETTIRKAVEKEQQTK EEMLKNKLLQEKEEDLNKL  
KVELEEKLKSTITATKSQWLKEKESDVKQQIENEVILAKTQWEKEQKEIKDKVIQQLEREWRFKLDQTIKE  
MKKKTFFDCGIQTDQI INPDVISKKE-  
MEAVIEEQQLKIQQDVLQEKEIAIKEALRKQEKEMETHYRENI IKQVEIAVLNARSRWVQELPELAEYRAN  
IKAEQKKWETEHEL SVAKKVS LALLEAKEKWKIELGNTEESV---  
KELEAKIFSLQRELELKEEEEIPVIVRAKLAKSRSEWNKEKQEEIHSIQEQNEKDYRKFLDDHRNKINEVLA  
AAKEDFMKQKT-----  
-----  
-----

ELILQKEAELQACLEQKQREWTTIQEGQLQMEIHQYEEEDVLTEIELLVEEIEEELSGI-  
ENKHL SKTKSPCFPRRLNAQYLEKLRACIQMAFRGTL YRLLENS NP EWK MCRKILFESQEDS-----  
-----

CCEQCCKLEKAKQECQDLKMKLEKSCRHLQHAVREHKATVEKIGEENSRVVEELMEENEMKMKLEELRA  
LSSTPPRSFSEGAVDHSCLICSGKGLEELRGHYIRAVKKIKSDMIRYIQASKERAAELLKAEIFKERQETA  
QRMQKYYLVCLHQQLLQDDGKEE-GAEKKIMNAASKLAAMAKMLET'PVVNRPQIKNSPSVSR-----  
SSELLPGVEQSKRNYMNSRASHMENKSSSRNKAGG---  
EQALQKRLPCNLRQRLEDTEHTETKHVAFREAPSGIPISVTACKQLDDLPRNVLLELAPCDGGRSKTGPHV  
-----

QFANTHTSTRAPGLSDSGSSHVTFQGLKEKRILKERKCNLSLTECCQQIVAEKSQDFDIQETPVKDEESGPS  
DSL DWSSKNVTSQALSSSDTSFLHPLQQGILDQKQVESV S F M Q F PANTCLSETEEKANKLCRQFQCQNDHIP  
AVKKEDKRTQTEQV NKSPGHASHHNSDVLKSDFKKLN SAVQSSSYHQHSRKL LMAPQASQQDSGFDS PFAN  
LD

>RATTUS

MTTNAQDFPNGGSGKLPAA TGALFEQPRSRNCGRLLNRSCGRRGFRLGVPPSGQAHRAAAAIGGNRCSSSG  
GVRGLGCTGKVLGKSRQVAGGDCSLTAGRAAAGSGPAFESPA PGRCVFAPCSVFSRGVSPVDLSAPVI  
PGRRTQLFGKAARTMSLEFGSVALQTQNEDEEFFDKEDYEREKELQQLLTDLPHDMLDDELSSPERRSDC  
SVDGIAGELYPSEHLERKWI ERDILP-KPH-----GVNCGNGWEEENRSEPEDQRLGYHPG-  
EGDEGGS-----GYSPPGKQE QADLYR LPEDFR PYTGRQKQ-----  
AASVIT'FSDPQRDSF-Q-----  
-----

VLNKAKEQLDSLVEKLNDRERQIRYLNHQLLIVQDEKDGLALSRESQKLFQSGKEREMQLEAQIHALET  
QIEAFKVSEELTKKLRTEITLES LKQQLVELHHSESLQRAREQHESV VAGLTQKY-----  
-----

EEQEDVCTRLKDHVQQLEARNQEA VRLEKTELINRLTRSL EDSQKQCAHLLQSGSVHEVTQLQLQQLQQAQKA

HILSESMNKALQEELTGLKEEISLYESAELGVLPGDVEGDLSELVETESVGLGKINVSWKQSKANSVAQQ  
EPPNEKLSKDEVILKLTQVQRLLSSNSMKRHLVSELQRDLRDCRETMEALQQSKDSDRG--  
METKTETSEKTTNQLWLDSPEAIN--REDILRLKNEVEVLQQQN-----  
QELKEAEEKLRSTNQDL CNQMRQMVQEFDHDKQEAVDRCERTYQQHHEAMKAQIRESELLAKHAAEKQHLSE  
VYEGTQSQLRSDLDKLNKEVAAVQECYLEVCREKDELESTLRKTMEKAQEQTRQLE-----  
DREEHVRKLELEERYQETLKAQKQSWLKAQAAGATQV-----  
EHESRQKLIQQLEEEWQSKLNHSLPARRKATSDCGSQTDQAAYPAMPNAE-ALVLAEEQA----  
HQVQOQEKELTVKEALRKSEVELELKYCESIAQKVETAVQNARSRWILELPLAEYKALLRAQQQEWAKQQE  
VAVAHRLSLALSEAKEKWKSELQNMKPNVASVQEELEEKIHSLQKELELKDDEEVPVAVRAELAKARNEWNKE  
KQEEIHKIQEQNEEDYRQFLEDHRNKINEVLTAAKEDFVKQKT-----  
-----  
-----

ELLLQKETEFQACL DQSRKEWTLQEAQRTQLEVHRYEEDILTVLDFLLRDTQLEVDGDSQKQLLEVMSVC  
SSKWT SVQYFEKVKACIHKALQDTLSLLIDNIASEREKSHHQHLTSGIHWCQCDASTTLRYEHKQHHWKD  
PEQSGGLRGMSLDLTPKMTHTPSPRSPASVPPPAHHKKIFEMKDLCCGHCFQEELEKEKQECQDLRRKLEKS  
RRHLQHLERTHKATVEKLG-----  
-----  
-----  
-----  
-----

>ORANGUTAN

MSLDFGSVALPVQNEDEEYDKEDYEREKEFQLLT--LPQDMLEDLYSEVQY---  
SCSAVSTDGLPHHPEQLEMSWNEQGTSSKQSVKGYKEIKNLYVGEKCRKVWEENTSKTEDRHPVYHPPEGG  
DEGGS-----  
GYSPPSKCEQTDLYHLPENFRPYTNGQKQEFMNNQATNVIKFSQPQWNHF-Q-----  
GPSCQGLEPYNKVYKPYQCSAQNN-GSPAQEAIA-GSDTFEGLQQQFLG-  
ANENSVENMKIIQLQVLNKAKEKQLENLIEKLNESERQIRYLNHQLVIKDEKDGTLTSLRESQKLFQNGK  
EREIQLEAQIKALETQIQALKVNEEQMIKKSRTEMALESQKQLVLDLHHSESLQRAREQHESIVMGLTKK  
YEEQVLSLQKNLDATVTALKEQEDICSRKLDHVKQLERNQEAIKLEKTEIINRLTRSLEESQKQCAHLLQS  
GSVQEVQALQFQLQQAQKAHAMSENMNKALQEELTELKDEISLYESAALGIHPSDSEGELNIELTESYVD  
LGIKKVNWKKSKVPSIVQQEDPNEELSKDEFILKLAQVQRLLGNSNSMKRRLVSQLQNDLKDCHKKIEDLH  
QVKKDEKSIEVETKTDTSEKPKNQLWPESSTSD-IVRDDILLKNEIQVLQQQN-----  
QELKETEEKLRNTNQDL CNQMRQMVQDFDHDKQEAVDRCERTYQQHHEAMKTQIRESELLAKHALEKQQLFE  
AYERTHLQLRSELDKLNKEMTAVQECYLEVCREKDNLESTLRKTIEKEQQTQE-----  
-----  
-----

KIKEKLTQQLEKEWQSKLDQTIKAMKKKTSDCGSQTDQVTTSDVISKKE-  
MAIMIEEQKCTIQQNLEQEKDIAIKGAMKKLEIELELKHENITKQVEI AVQNARQRWLGELPELAEYQAL  
VRAEQKKWEEQHEVSVNKRISFAVSEAKEKWKSELENMKNTLPGKELEEKIHSLQRELELKNEEVPVIR  
AELAKARSEWNKEKQEEIHRIQEQNEQDYRQFLDDHRNKINEVLAAAKEDFMKQKT-----  
-----  
-----

ELLLQKETELQTC LDQSRREW TMQEAARRIQLEIYQYEEEDILTVLGVLLSDTQKEHISDSEDKQLLEIMSTC



SSKWMVQYFEKLGKCIQKAFQDTPLLIENTDPEWKKRNMAELSKDSACRGTG-  
RGDPGPAAGHHAQPLALQETEAEA-----

EENNKVVEELIEENNDMKNKLEELRTLCKTPPRSLGAGAIENACLPCSSGGALEELRGQYIKAVKKIKRDML  
RYIQESKERAAEMVKAEVLRRERQETARKMRKYYLICLQQLQDDGK-E-  
GAEKKIMNAASKLATMAKLETPISSKSQSKTTQS-----  
ALPLTSEMLITVEKSKRNDVNQKIPCCIESKSNVNTITRSLCEQAPKRRRAASNLKRLLENSHQSIKHVG  
SKETHLEFQFGDGSCKHLNSLPRNVSPFVPCGEGGGFLHKKKDLLSDNGSESLLSAAYPFL-----  
GTLGNKPSRPTPGPSESGMHI TFRDSNERLGLKVYKCNPLMES-ENAASEKSQGLDVQEPVVKDGG-  
DLSDCLGWPSSA-TLSFDSREASFVHGRPQGTLEIPSESVNSKQFSPSGYLSDT-  
EKSNMICQTMKCQRDQTPYLSSEETMYLEPGKISVNCGHPSHRKADRLKSDFKKLSSTLPSSVCQQPSRKL I  
V-PLSSQQDSGFDSPFVNL D

>CHICK

MSLDFDSGALQTQHEDEDYDQEDYAREQELQQLLTDLPHDMLEDSGDQLSN-  
YSDSSIHETEEQSQEARKPDGRWHDHLLIN-  
DAQNGYEQQNLYPDQFLCDQNDHVEKHAKNWNGLHSSEQMKHLYDVKEDYSGQNSQEDPDDIYLD RDGF  
NAPGCYQQSNLYHLPENFRPYTNGHNPEFNSQQNQI INFDPAPKEHLKQPFVVTSEVVSGQSAESY-  
KVMYKPYQNDVHKKIPVTQEGMR-RNEVFEDLHHEFGS-  
NDENSSENMQILQLKALNKARERRVEELNEKLEKSAQQIRYLSHQLSMVTDEKDGAVSLHESQKLYQNGK  
EREVYLEGQIKALETQIQTLTNEEQILKQSRVAEVAMESMOKQLELQORSDTLQRAREQHDAIVTALKQK  
HEKQVVSLEQKLDATKSALQEQKELCQNLGERVKELEKMLEETKCEKTEI INRLTRSL EESQKQCANLLQT  
GSIQEANQLRFQLQQAQSAHTI SNDMNLALQPVTNQNDALVA-----

SPLVSDNLKEEVLRLRKRKANEALLREVQNHALTIEELKENEKLRSSNQDLCCQMRKMVQEFDEDKQEAIDR  
CERTYQQHHEDTKAQFEKMMQRYAAEKQQLIQSYEETVLQLKATIEELNREMTTVKECYIAVCGEKDTLE  
TTLRQTF AHEQQMKED-----  
-----KKEDVIAKIEREWQNRLEEIKKTMFECK-DCSSQTDREVTRVSDASTE E-  
LARIVEDQKLQIQKALKEKK--  
ASEEALKELEIELESKYRKLASQVEAALTQAHARSLQELTDLKEYEVNLGTEQEQEREQTETAALLAL  
AFSSDELKWKKERECTEQSGSIRELEEKVVSLKKELELKEEEIPVTIKA AVAKARAQWNKEKQEEIAQIQ  
EQNERDYRSFLDDHRNKIKEVLATTKEDLAKQVNDLSAQKEAEMKMILDQKQREWEAQETKRLQDEINRYE  
EKTLIELECLLREVHEELVKSTYSQHSWEEKDPDAPVELNHQRKDKLKAQLQAYRRTVHKILEKHEQEWK  
EVEAALTQAHARSLQELTDLKEYELALAFSSDELKWKKERECTEQSGSIRELEEKVVSLKKELELKEEEI  
PVTIKA AVAKARAQWNKEKQEEIAQIQEQNERDYRSFLDDHRNKIKEVLATTKEDLAKQVNDLSAQKEAEM  
KMILDQKQREWEAQETKRLQDEINRYEEKTLIELECLLREVHEELVKSTYSQHSWEERDPDAPVELNHQRK  
DKLKAQLQAYRRTVHKILEKHEQEWKNEELLNANKEVCCCMQGGDGETGDMARSPLYNTGQQAETQR

RLRRRHRSGTDGVCMQASTEPGEQADQMVSWSRLQSKGSVSKACSSRGSVK-----

GATLEEMRAQYIKSVS KIKSDMLCYIRESKERAAAMIKAEVLRRERQETARKMRKYYLTC LQQLLTDNGK-  
QEGA EKKIMNAASKLV TMAKGLETPLRHTLQCR TTRS-----  
ALLLNSDLPTGVEYAKRDCLSQTRPNH MENKSCGKNTTEEANDKV V--  
RKYVPRDLRQQFGARQTE TQHMLHETDTSDIQNSNI-  
CKHLVSAGIDGLSKILPNVDGRKEKYSPLVNL DKELLCATSNFAHPNVSPFACQGQLENIDAARLKN GP AI  
SGSTHHMLKSKNERTTLKVDKCILSHGT-WQTTYERIQDFDFHRTPER----DEGSCSEWSSASG-  
SLHL DGS DKS AVYPEEK PSTNEQRQSVYCEESFSAGDENFGT SWREL TNGNVKNFNVKNS-----  
-----PIVYNRDKLRSHSDHISSLGPKD TNSANTRTNTL-PI-----

>MOUSE

MSLEFGSVALQTQNEDEEFDKEDFEREKELQQLLTDLPHDMLDDELSSPERHSDSDCSMDGRAAEHPHPSEHL  
ERKWI ERDILP-KPH-----SMNCGNGWEENRSKTEDQHLGYHPGEGGDEGGS-----  
-----GYSPPGKREQADLYRLPEDFRPYTGGSKQ-----AASVITFSDPQRDNF-  
QQFGLSRGPSCGALEPY-KAVYKPYRNSSVQKNSSPAQEVA-  
ASDMFEGLQQQFLGANETDSAENIHI IQLQVLNKAKERQLDSLVEKLDKDSERQVRYLSHQLLIVQDEKDGL  
ALSLRESQQLFQNGKEREMQLEAQIAALEAQVEAFRVSEEKLTKKLRTEITLESKQQLVELHHSESLQR  
AREHHESIVASLTQKHEEQVSSSLQKNLDATITALQEQESI CTRLKDHVQQLEARNQEA VRLEKTELINRLTR  
SLED SQCAHLLQSGSVQEV AQLLQLLQQAQKAHVLSSESMNKALQEELTELKDEISLYESAAELGVLPGD  
SEGDL SIELTESCVDLGIKKVNWKQSKANRVTQQESPDEDPSKDELILKLTQVQRLLTNSVVRHLVSQL  
QSDLRECRETMEAFQQSKDGDGSG--METKTD TSEKTTKQLWLESSEAIN--REDILQLKNEVQVLQKQN--  
-----  
QELKEAEKLRSTNQDL CNQMRQMVQEFDHDKQEA VARCERTYQQHHEAMKAQ IRESLLAKHAVEKQHLLLE  
VYEGTQSQLRSDLDKMNKEMAAVQECYLEVCREKDGLESTLRKTMKAQEQKRQLLE-----  
AREEYVRKLELEEKYQETLKTERRQSWLQEQAAAGATQQA-----  
EKESRQKLIQQLEKEWQSKLDDSLAAWRKTTSDRGSQTEQVACPAAVSKAEAAA VLAEEQA-----  
RQVQQEKELATKEALRKPEVELELKYCEIIAQKVETAVQNARSRWIQELPMLAEYKALLRAQQQEWAKQQE  
LAVAHRLSLALSEAKEKWKSELENMKNVMSVKELEEKVHSLQKELELKDDEEVPVIVRAEVAKARTEWNKE  
KQEEIHKIQEQNEEDYRQFLEDHRNKINEVLAAAKEDFVKQKA-----  
-----  
-----  
ELLLQKETEFQACLDQSRKEWTLQEAQQTQVEIRQYEEDTLTVLAYLLKDTQLEYGGDSQDKQLLEAMSAC  
SSKWI SVQYFEKVKACIQKALHDMLSLLTDSVASEQEKRKVVKSSADTVSWTSS-  
EGDSAVPVPLPDSTSVRCAQSSAWLKAE AETD-----  
KKICEIKGLRCGHCFOELEKEKQECQDLRRKLEKRRHLQHLE RTHRAAVEKLGEE NSRVVEELIEENHDM  
KNKLEALRALCRTPPRSL SAGAAESAGPSCSRQALEELRGQYIKAVRKIKRDMLRYIQESKERA AEMVKAE  
VLRERQETARKMRNYLSCLQQILQDNGK-  
EEGAEEKIMSAA SKLATMAELLGTIAESDCRVRCAQAGRSVALPLASEMLTGTERSERSGVNHNIPHYVES  
KPN SGKTLPRSVCEQLPGRKAAPRSQRRLEESKHREMRPMASTALP SDCRCGDASCRHSGVLAKDVAPEFV  
PCQEGGGFDLHEKRDALGA-GSEPLLYSAAHSFL----GGAEKNSSPRCISE-----  
SRHTTLRSPSEMPRLKALMCGSP TET-DSIASEKSQGVGSQDSPVKDGV-GPSSSPAWPSDSTLPC--  
GSPAVLFLGDGSQRTQEMLGDSVQWKQFSATSCHPDA-QKSNMVCRSSHTLD-----  
LPKETLHSQQGKMGATLGHPSPQSTDMLKTD FKRRLSGTGPSSSLCQKPLIKLTA-PMPSQQDSGFDSPLE--  
-
